# Supplementary material for: Population-Based Resequencing of APOA1 in 10,330 Individuals: Spectrum of Genetic Variation, Phenotype, and Comparison with Extreme Phenotype Approach
Source: PubMed Central journal article supplement (PMC3510059; doi:10.1371/journal.pgen.1003063), 2012-11-29
Supplement: pgen.1003063.s003.pdf [file pgen.1003063.s003.pdf]

**Table S1: PCR primers and fragment lengths for high-resolution melting analysis using a LightScanner followed by sequencing of *APOA1* in the Copenhagen City Heart Study.**

| <i>APOA1</i> | Forward primer<br>5' → 3'         | Reverse primer<br>5' → 3'       | Fragment length |
|--------------|-----------------------------------|---------------------------------|-----------------|
| Exon 2       | IVS1-119'TACCTGAGGTCTTCTCCCGCTCT  | IVS2+35'CCGATGGTTGGCTCCCTAGGTTA | 217 bp          |
| Exon 3       | IVS2-38'ACAGCTGGCCTGATCTG         | IVS3+17'CCAGGCTGGGTCCTTAC       | 212 bp          |
| Exon 4a      | IVS3-30'AGCCCTCAACCCTTCTGTCTCAC   | c.506'CCCAGTGGGCTCAGCTTCTCTTG   | 336 bp          |
| Exon 4b      | c.432'GCCGCTGCGCGCAGAGCTCCAAGAGGG | *44'AAACGTTTATTCTGAGCACCGGGAAGG | 418 bp          |

The primers were designed using Oligo 6.71 (Molecular Biology Insights Inc., CO, USA) and the *APOA1* consensus sequence NC\_000011.9. The start site for each primer is indicated.
