# Supplementary material for: Population-Based Resequencing of APOA1 in 10,330 Individuals: Spectrum of Genetic Variation, Phenotype, and Comparison with Extreme Phenotype Approach
Source: PubMed Central journal article supplement (PMC3510059; doi:10.1371/journal.pgen.1003063), 2012-11-29
Supplement: pgen.1003063.s004.pdf [file pgen.1003063.s004.pdf]

**Table S2. Genetic variation identified in the core promoter, coding region and exon-intron boundaries of *APOA1* in the Copenhagen City Heart Study (n=10,330).**

| Gene<br>Region | Nucleotide<br>Substitution <sup>a</sup> | Amino<br>Acid<br>Residue (minor allele frequency,%) | No. of individuals in<br>CCHS, n=10,330 | Functional Region/Function                          | Previous reports/<br>rs numbers |
|----------------|-----------------------------------------|-----------------------------------------------------|-----------------------------------------|-----------------------------------------------------|---------------------------------|
| Promoter       | g.-647A>G                               | -                                                   | 106 (0.5)                               | 192 bp 5' of regulatory region D (HRE) <sup>b</sup> | -                               |
| Promoter       | g.-560A>C                               | -                                                   | 718 (3.5)                               | 105 bp 5' of regulatory region D (HRE) <sup>b</sup> | [1]/rs12718466                  |
| Promoter       | g.-310G>A                               | -                                                   | 3,043 (16.0)                            | 2 bp 3' of regulatory region B (HRE) <sup>b</sup>   | [1]/rs670                       |
| Intron 1       | g.-151C>T                               | -                                                   | 712 (3.5)                               | 67 bp 3' of regulatory region A <sup>b</sup>        | [1]/rs5069                      |
| Intron 1       | g.-150G>A                               | -                                                   | 143 (0.7)                               | 68 bp 3' of regulatory region A <sup>b</sup>        | rs1799837                       |
| Intron 1       | g.-108_-106delCTC                       | -                                                   | 3 (0.01)                                | 111 bp 3' of regulatory region A <sup>b</sup>       | rs61758321                      |
| Intron 1       | g.-89G>A                                | -                                                   | 7 (0.03)                                | 130 bp 3' of regulatory region A <sup>b</sup>       | -                               |
| Intron 1       | g.-35_-33delCTT                         | -                                                   | 1 (0.005)                               | 184 bp 3' of regulatory region A <sup>b</sup>       | -                               |
| Intron 1       | g.-11G>A                                | -                                                   | 12 (0.06)                               | 208 bp 3' of regulatory region A <sup>b</sup>       | -                               |
| Exon2          | c. 9T>C                                 | A(-22)A                                             | 1 (0.005)                               | Prepeptide <sup>c</sup>                             | -                               |
| Exon 2         | c. 14T>C                                | V(-20)A                                             | 1 (0.005)                               | Prepeptide <sup>c</sup>                             | -                               |
| Intron 2       | IVS2+41C>T                              |                                                     | (30.0) <sup>d</sup>                     | -                                                   | [1]/rs5070                      |
| Exon 3         | c. 83C>G                                | P4R                                                 | 2 (0.01)                                | Amino-terminal end                                  | [2,3]                           |

|          |              |         |                    |                                                                             |                     |
|----------|--------------|---------|--------------------|-----------------------------------------------------------------------------|---------------------|
| Exon 3   | c. 79delC    | V11X    | 1 (0.005)          | Helix 1                                                                     | [4,5]               |
| Exon 3   | c. 108G>A    | K12K    | 4 (0.02)           | Helix 1                                                                     | -                   |
| Exon 3   | c. 147C>T    | S25S    | 3 (0.01)           | Between helix 1 and 2 – potential ESE                                       | -                   |
| Exon 3   | c. 176G>T    | G35V    | 1 (0.005)          | Between helix 1 and 2                                                       | -                   |
| Exon 3   | c. 178T>G    | S36A    | 5 (0.02)           | Between helix 1 and 2                                                       | [6,7]               |
| Exon 3   | c. 181G>A    | A37T    | 2 (0.01)           | Between helix 1 and 2                                                       | [1,8,9] /rs12718465 |
| Intron 3 | IVS3+33C>T   |         | (6.0) <sup>d</sup> | -                                                                           | [1]/rs2070665       |
| Exon 4   | c.284T>A     | F71Y    | 9 (0.04)           | Induction of hypertriglyceridemia <sup>e</sup> and amyloidosis <sup>f</sup> | [7]                 |
| Exon 4   | c. 294C>A    | N74K    | 1 (0.005)          | Induction of hypertriglyceridemia <sup>e</sup> and amyloidosis <sup>f</sup> | -                   |
| Exon 4   | c. 298G>C    | E76Q    | 2 (0.01)           | Induction of hypertriglyceridemia <sup>e</sup> and amyloidosis <sup>f</sup> | -                   |
| Exon 4   | c. 391delAAG | K107del | 4 (0.02)           | Induction of hypertriglyceridemia <sup>e</sup>                              | [10-14]             |
| Exon 4   | c.498C>A     | S142R   | 1 (0.005)          | Helix 5                                                                     | -                   |
| Exon 4   | c.503T>G     | L144R   | 4 (0.02)           | Activation of LCAT <sup>e</sup>                                             | [4,15]              |
| Exon 4   | c.524G>A     | R151H   | 1 (0.005)          | Activation of LCAT <sup>e</sup>                                             | -                   |
| Exon 4   | c.526G>A     | A152T   | 1 (0.005)          | Activation of LCAT <sup>e</sup>                                             | -                   |
| Exon 4   | c.529C>T     | R153C   | 1 (0.005)          | Activation of LCAT <sup>e</sup>                                             | -                   |
| Exon 4   | c.562G>T     | A164S   | 24 (0.1)           | Activation of LCAT <sup>e</sup>                                             | [4]                 |
| Exon 4   | c.564G>G     | A164A   | 2 (0.01)           | Activation of LCAT <sup>e</sup> – potential ESE                             | -                   |

|            |                     |       |                    |                                                     |                |
|------------|---------------------|-------|--------------------|-----------------------------------------------------|----------------|
| Exon 4     | [c.572G>A;c.753C>A] | S167L | 2 (0.01)           | Activation of LCAT <sup>e</sup>                     | -              |
| Exon 4     | c.642C>G            | A190A | 5 (0.02)           | Helix 8 – potential ESE                             | -              |
| Exon 4     | c.669T>C            | H199H | 1 (0.005)          | Helix 8 – potential ESE                             | -              |
| Exon 4     | c.732C>G            | P220P | 2 (0.01)           | Interaction with ABCA1 <sup>e</sup> – potential ESE | rs5080         |
| 3'UTR      | *8G>A               |       | 4 (0.02)           | Potential ESE                                       | -              |
| 3'UTR      | *17C>T              |       | 7 (0.03)           | -                                                   | -              |
| 3'UTR      | *141G>A             |       | 33 (0.2)           | -                                                   | -              |
| Intergenic | *178T>A             |       | (1.6) <sup>d</sup> | -                                                   | [1]/rs5081     |
| Intergenic | *181A>G             |       | (3.5) <sup>d</sup> | -                                                   | [1]/rs12718463 |

In shaded grey, genetic variants identified by screening the regulatory and coding regions of *APOA1* in 95 individuals with extreme low apoA-I levels and 95 individuals with extreme high apoA-I levels in the Copenhagen City Heart Study followed by genotyping in the whole population [16]. <sup>a</sup>Nucleotide +1 denotes A in the start codon ATG (*translational* start site) in exon 2 (NM\_000039.1), corresponding to base position 236 in *APOA1* consensus sequence NC\_000011.9; to convert to nucleotide position relative to the *transcriptional* start site add 235 nucleotides. <sup>b</sup>Four regulatory regions, A-D, have been reported in the *APOA1* promoter, of which regions B and D are hormone responsive elements (HRE) that among others bind hepatic nuclear factor 4; element C binds CCAAT enhancer binding protein [17]. <sup>c</sup>Full-length apoA-I (267 amino acids) includes a preprotein (18 amino acids) and a proprotein (6 amino acids), which are consecutively cleaved to form the mature protein (243 amino acids). <sup>d</sup>Frequency of genetic variants determined based on screening the regulatory and coding regions of *APOA1* in 95 individuals with extreme low apoA-I levels and 95 individuals with extreme high apoA-I levels in the Copenhagen City Heart Study [16]. <sup>e</sup>Reference [18]. <sup>f</sup>Reference [19]. ABCA1 = ATP Binding Casette Transporter A1; ESE = exonic splicing enhancer region predicted by use of “Esefinder” (<http://rulai.cshl.edu/cgi-bin/tools/ESE3/esefinder.cgi>). LCAT = Lecithin:cholesterol acyltransferase.

## REFERENCES S1

1. Fullerton M, Buchanan V, Sonpar A, Taylor L, Smith D et al. (2004) The effects of scale: variation in the APOA1/C3/A4/A5 gene cluster. *Hum Genet* 115: 36-56.
2. Menzel HJ, Assmann G, Rall SC, Jr., Weisgraber KH, Mahley RW (1984) Human apolipoprotein A-I polymorphism. Identification of amino acid substitutions in three electrophoretic variants of the Münster-3 type. *J Biol Chem* 259: 3070-3076.
3. von Eckardstein A, Funke H, Henke A, Altland K, Benninghoven A et al. (1989) Apolipoprotein A-I variants. Naturally occurring substitutions of proline residues affect plasma concentration of apolipoprotein A-I. *J Clin Invest* 84: 1722-1730.
4. Haase CL, Frikke-Schmidt R, Nordestgaard BG, Kateifides AK, Kardassis D et al. (2011) Mutation in APOA1 predicts increased risk of ischaemic heart disease and total mortality without low HDL cholesterol levels. *J Int Med* 270: 136-146.
5. Miccoli R, Bertolotto A, Navalesi R, Odoguardi L, Boni A et al. (1996) Compound heterozygosity for a structural apolipoprotein A-I variant, apo A-I(L141R)Pisa, and an apolipoprotein A-I null allele in patients with absence of HDL cholesterol, corneal opacifications, and coronary heart disease. *Circulation* 94: 1622-1628.
6. Kiss RS, Kavaslar N, Okuhira Ki, Freeman MW, Walter S et al. (2007) Genetic etiology of isolated low HDL syndrome: Incidence and heterogeneity of efflux defects. *Arterioscler Thromb Vasc Biol* 27: 1139-1145.
7. Rowczenio D, Dogan A, Theis JD, Vrana JA, Lachmann HJ et al. (2011) Amyloidogenicity and clinical phenotype associated with five novel mutations in apolipoprotein A-I. *Am J Pathol* 179: 1978-1987.

8. Araki K, Sasaki J, Matsunaga A, Takada Y, Moriyama K et al. (1994) Characterization of two new human apolipoprotein A-I variants: apolipoprotein A-I Tsushima (Trp-108->Arg) and A-I Hita (Ala-95->Asp). *Biochim Biophys Acta* 1214: 272-278.
9. Matsunaga T, Hiasa Y, Yanagi H, Maeda T, Hattori N et al. (1991) Apolipoprotein A-I deficiency due to a codon 84 nonsense mutation of the apolipoprotein A-I gene. *Proc Natl Acad Sci USA* 88: 2793-2797.
10. Rall SC Jr., Weisgraber KH, Mahley RW, Ogawa Y, Fielding CJ et al. (1984) Abnormal lecithin:cholesterol acyltransferase activation by a human apolipoprotein A-I variant in which a single lysine residue is deleted. *J Biol Chem* 259: 10063-10070.
11. Utermann G, Feussner G, Franceschini G, Haas J, Steinmetz A (1982) Genetic variants of group A apolipoproteins. Rapid methods for screening and characterization without ultracentrifugation. *J Biol Chem* 257: 501-507.
12. Amarzguioui M, Mucchiano G, Häggqvist B, Westermark P, Kavlie A et al. (1998) Extensive intimal apolipoprotein A1-derived amyloid deposits in a patient with an apolipoprotein A1 mutation. *Biochem Biophys Res Commun* 242: 534-539.
13. Tilly-Kiesi M, Packard CJ, Kahri J, Ehnholm C, Shepherd J et al. (1997) In vivo metabolism of apoA-I and apoA-II in subjects with apo A-I(Lys107->0) associated with reduced HDL cholesterol and Lp(AI w AII) deficiency. *Atherosclerosis* 128: 213-222.
14. Tilly-Kiesi M, Qiuping Z, Ehnholm S, Kahri J, Lahdenpera S et al. (1995) ApoA-IHelsinki (Lys107->0) associated with reduced HDL cholesterol and LpA-I:A-II deficiency. *Arterioscler Thromb Vasc Biol* 15: 1294-1306.

15. Recalde D, Velez-Carrasco W, Civeira F, Cenarro A, Gomez-Coronado D et al. (2001) Enhanced fractional catabolic rate of apo A-I and apo A-II in heterozygous subjects for apo A-I Zaragoza (L144R). *Atherosclerosis* 154: 613-623.
16. Haase CL, Tybjaerg-Hansen A, Grande P, Frikke-Schmidt R (2010) Genetically elevated apolipoprotein A-I, high-density lipoprotein cholesterol levels, and risk of ischemic heart disease. *J Clin Endocrinol Metab* 95: E500-E510.
17. Zannis VI, Kan HY, Kritis A, Zanni EE, Kardassis D (2001) Transcriptional regulatory mechanisms of the human apolipoprotein genes in vitro and in vivo. *Curr Opin Lipidol* 12: 181-207.
18. Zannis VI, Koukos G, Drosatos K, Vezeridis A, Zanni EE et al. (2008) Discrete roles of apoA-I and apoE in the biogenesis of HDL species: Lessons learned from gene transfer studies in different mouse models. *Ann Med* 40 Suppl 1: 14-28.
19. Eriksson M, Schönland S, Yumlu S, Hegenbart U, von Hutten H et al. (2009) Hereditary apolipoprotein AI-associated amyloidosis in surgical pathology specimens. Identification of three novel mutations in the APOA1 gene. *J Mol Diagn* 11:257-262.
