# Supplementary material for: Population-Based Resequencing of APOA1 in 10,330 Individuals: Spectrum of Genetic Variation, Phenotype, and Comparison with Extreme Phenotype Approach
Source: PubMed Central journal article supplement (PMC3510059; doi:10.1371/journal.pgen.1003063), 2012-11-29
Supplement: pgen.1003063.s005.pdf [file pgen.1003063.s005.pdf]

**Table S3. Differences ( $\Delta$ ) in relative percentiles (50<sup>th</sup> percentile in population minus heterozygote percentile) and in absolute levels (noncarriers minus heterozygotes) of apolipoprotein A-I and HDL cholesterol for *APOA1* variants in the Copenhagen City Heart Study and in the Copenhagen General Population Study.**

| <i>APOA1</i> variant | Median difference in apolipoprotein A-I                                 |             |                                                                      |             | Median difference in HDL cholesterol                                        |             |                                                                      |             |
|----------------------|-------------------------------------------------------------------------|-------------|----------------------------------------------------------------------|-------------|-----------------------------------------------------------------------------|-------------|----------------------------------------------------------------------|-------------|
|                      | $\Delta$ Percentiles<br>(50 <sup>th</sup> percentile–<br>heterozygotes) | P-<br>value | $\Delta$ Absolute levels (mg/dL)<br>(noncarriers –<br>heterozygotes) | P-<br>value | $\Delta$ Percentiles<br>(50 <sup>th</sup> percentile in –<br>heterozygotes) | P-<br>value | $\Delta$ Absolute levels (mg/dL)<br>(noncarriers –<br>heterozygotes) | P-<br>value |
| <b>K12K</b>          |                                                                         |             |                                                                      |             |                                                                             |             |                                                                      |             |
| CCHS n=4             | 11 (-23 to 32)                                                          |             | 8 (-36 to 38)                                                        |             | 19 (2 to 36)                                                                |             | 0.22 (0 to 0.52)                                                     |             |
| CGPS n=16            | 18 (-1 to 35)                                                           | 0.67        | 16 (8 to 24)                                                         | 0.29        | 13 (-11 to 30)                                                              | 0.60        | 0.18 (0 to 0.37)                                                     | 0.77        |
| <b>S25S</b>          |                                                                         |             |                                                                      |             |                                                                             |             |                                                                      |             |
| CCHS n=3             | 6 (-24 to 46)                                                           |             | 14 (-30 to 53)                                                       |             | 4 (-50 to 48)                                                               |             | 0.10 (-2.00 to 0.90)                                                 |             |
| CGPS n=24            | 16 (-26 to 38)                                                          | 0.94        | 8 (-6 to 21)                                                         | 0.74        | 8 (-30 to 37)                                                               | 0.84        | 0.05 (-0.20 to 0.28)                                                 | 0.31        |
| <b>S36A</b>          |                                                                         |             |                                                                      |             |                                                                             |             |                                                                      |             |
| CCHS n=5             | 40 (36 to 42)                                                           |             | 29 (18 to 40)                                                        |             | 36 (24 to 43)                                                               |             | 0.40 (0.30 to 0.50)                                                  |             |
| CGPS n=29            | 26 (12 to 43)                                                           | 0.51        | 11 (4 to 19)                                                         | 0.19        | 21 (-7 to 31)                                                               | 0.07        | 0.06 (-0.08 to 0.20)                                                 | 0.11        |
| <b>F71Y</b>          |                                                                         |             |                                                                      |             |                                                                             |             |                                                                      |             |
| CCHS n=9             | -23 (-29 to 11)                                                         |             | -16 (-31 to 1)                                                       |             | -8 (-15 to 8)                                                               |             | -0.20 (-0.30 to 0.00)                                                |             |
| CGPS n=48            | 19 (-6 to 39)                                                           | 0.02        | 13 (6 to 19)                                                         | 0.01        | 21 (0 to 35)                                                                | 0.04        | 0.20 (0.07 to 0.32)                                                  | 0.09        |
| <b>K107del</b>       |                                                                         |             |                                                                      |             |                                                                             |             |                                                                      |             |
| CCHS n=4             | 27 (1 to 35)                                                            |             | 16 (-8 to 39)                                                        |             | 45 (26 to 46)                                                               |             | 0.40 (0.10 to 0.70)                                                  |             |
| CGPS n=9             | -22 (-35 to 5)                                                          | 0.03        | -10 (-21 to 2)                                                       | 0.17        | 33 (15 to 38)                                                               | 0.31        | 0.40 (0.14 to 0.66)                                                  | 0.82        |
| <b>L144R</b>         |                                                                         |             |                                                                      |             |                                                                             |             |                                                                      |             |
| CCHS n=4             | 47 (39 to 49)                                                           |             | 41 (22 to 60)                                                        |             | 48 (49 to 46)                                                               |             | 0.70 (0.60 to 0.80)                                                  |             |
| CGPS n=12            | 45 (43 to 49)                                                           | 0.80        | 47 (34 to 61)                                                        | 0.64        | 48 (49 to 46)                                                               | 0.90        | 0.85 (0.70 to 1.01)                                                  | 0.65        |
| <b>A164S</b>         |                                                                         |             |                                                                      |             |                                                                             |             |                                                                      |             |
| CCHS n=24            | -7 (-30 to 21)                                                          |             | -2 (-14 to 8)                                                        |             | 4 (-32 to 26)                                                               |             | 0.00 (-0.20 to 0.20)                                                 |             |
| CGPS n=108           | -1 (-28 to 22)                                                          | 0.59        | -1 (-6 to 4)                                                         | 0.50        | -3 (-29 to 17)                                                              | 0.59        | -0.04 (-0.12 to 0.05)                                                | 0.70        |
| <b>A190A</b>         |                                                                         |             |                                                                      |             |                                                                             |             |                                                                      |             |
| CCHS n=5             | 22 (4 to 39)                                                            |             | 17 (-1 to 36)                                                        |             | 0 (-3 to 39)                                                                |             | 0.20 (-0.10-0.50)                                                    |             |
| CGPS n=16            | -7 (-26 to 16)                                                          | 0.09        | -2 (-14 to 11)                                                       | 0.22        | -2 (-22 to 17)                                                              | 0.32        | 0.04 (-0.13-0.22)                                                    | 0.50        |

Differences in relative percentiles are shown as medians (interquartile range) between the 50<sup>th</sup> percentile in the population and heterozygotes for a given variant, and differences in absolute levels as median differences (95% confidence interval) between noncarriers and heterozygotes in the Copenhagen City Heart Study (CCHS) and the Copenhagen General Population Study (CGPS). P-values comparing relative percentile differences and absolute differences in the CCHS and CGPS by, respectively, Mann-Whitney U-test and z-test.
